# Supplementary material for: Effect of Solvents, Stabilizers and the Concentration of Stabilizers on the Physical Properties of Poly(d,l-lactide-co-glycolide) Nanoparticles: Encapsulation, In Vitro Release of Indomethacin and Cytotoxicity against HepG2-Cell
Source: MDPI journal article supplement (doi:10.3390/pharmaceutics14040870), 2022-04-15

**Effect of solvents, stabilizers and concentration of stabilizers on the physical properties of Poly (D, L-lactide-co-glycolide) nanoparticles: Encapsulation, *in vitro* release of Indomethacin and cytotoxicity against HepG2-cell**

Musaed Alkholief <sup>1</sup>, Mohd Abul Kalam <sup>1</sup>, Md Khalid Anwer <sup>2</sup>, Aws Alshamsan <sup>1, \*</sup>

<sup>1</sup>*Nanobiotechnology Unit, Department of Pharmaceutics, College of Pharmacy, King Saud University, PO Box-2457, Riyadh-11451, Saudi Arabia; [malkholief@ksu.edu.sa](mailto:malkholief@ksu.edu.sa) (MA), [makalam@ksu.edu.sa](mailto:makalam@ksu.edu.sa) (MAK)*

<sup>2</sup>*Department of Pharmaceutics, College of Pharmacy, Prince Sattam Bin Abdulaziz University, Al-Kharj-11942, Saudi Arabia; [m.anwer@psau.edu.sa](mailto:m.anwer@psau.edu.sa) (KA)*

Corresponding author email ID: [aalshamsan@ksu.edu.sa](mailto:aalshamsan@ksu.edu.sa) (Prof. Aws Alshamsan)

**Figure S1.** Different kinetic model plots for PLGA-NPs-1 (prepared with 1%, w/v PVA as stabilizer and CHCl<sub>3</sub> as organic solvent) (A) and PLGA-NPs-2 (prepared with 3%, w/v PVA as stabilizer and CHCl<sub>3</sub> as organic solvent) (B)

**Figure S2.** Different kinetic model plots for PLGA-NPs-5 (prepared with 1%, w/v PVA as stabilizer and DCM as organic solvent) (A) and PLGA-NPs-6 (prepared with 3%, w/v PVA as stabilizer and DCM as organic solvent) (B)

**Figure S3.** Different kinetic model plots for PLGA-NPs-9 (prepared with 1%, w/v PVP as stabilizer and CHCl<sub>3</sub> as organic solvent) (A) and PLGA-NPs-10 (prepared with 3%, w/v PVP as stabilizer and CHCl<sub>3</sub> as organic solvent) (B)

**Figure S4.** Different kinetic model plots for PLGA-NPs-13 (prepared with 1%, w/v PVP as stabilizer and DCM as organic solvent) (A) and PLGA-NPs-14 (prepared with 3%, w/v PVP as stabilizer and DCM as organic solvent) (B)

Figure S1

(A) 1%, w/v PVA as stabilizer and  $\text{CHCl}_3$  as organic solvent

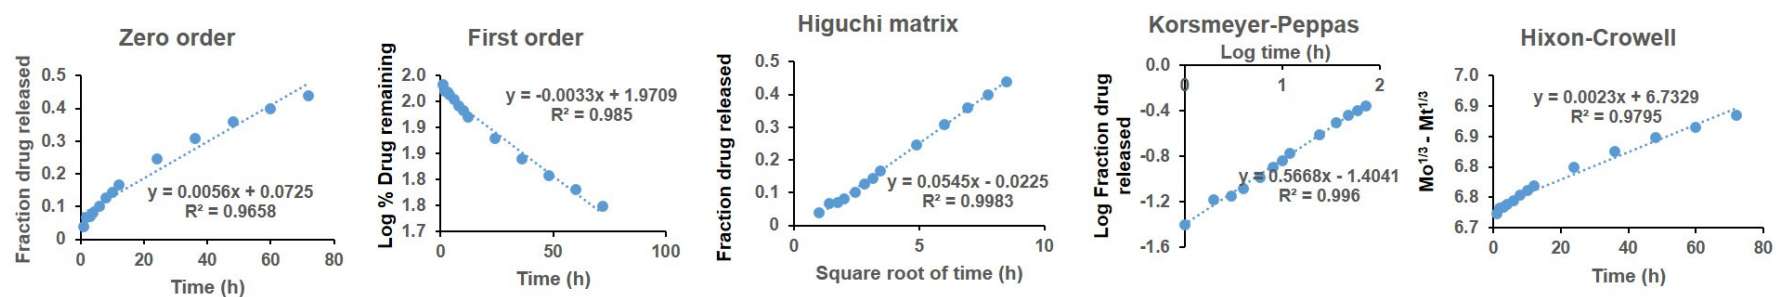

(B) 3%, w/v PVA as stabilizer and  $\text{CHCl}_3$  as organic solvent

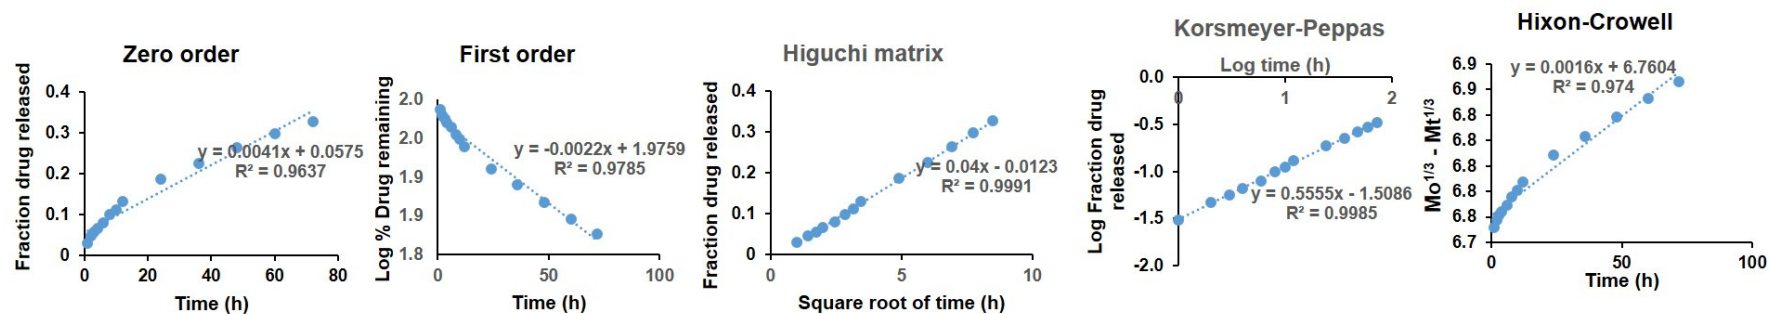

Figure S2

(A) 1%, w/v PVA as stabilizer and DCM as organic solvent

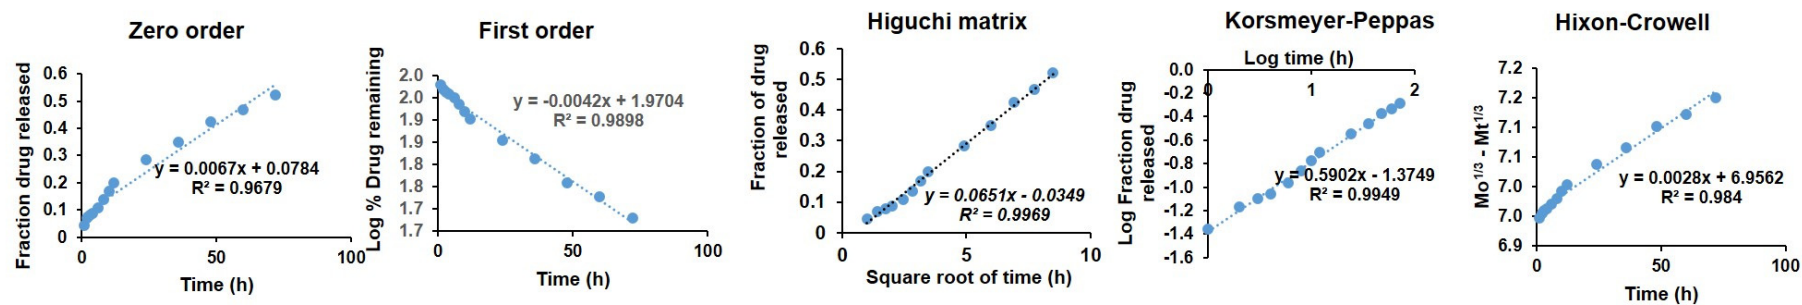

(B) 3%, w/v PVA as stabilizer and DCM as organic solvent

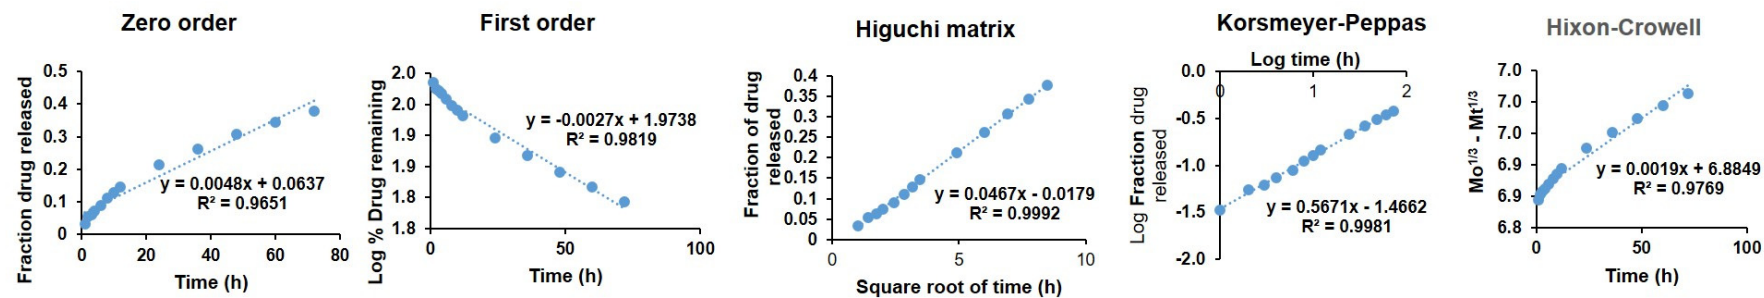

Figure S3

(A) 1%, w/v PVP as stabilizer and  $\text{CHCl}_3$  as organic solvent

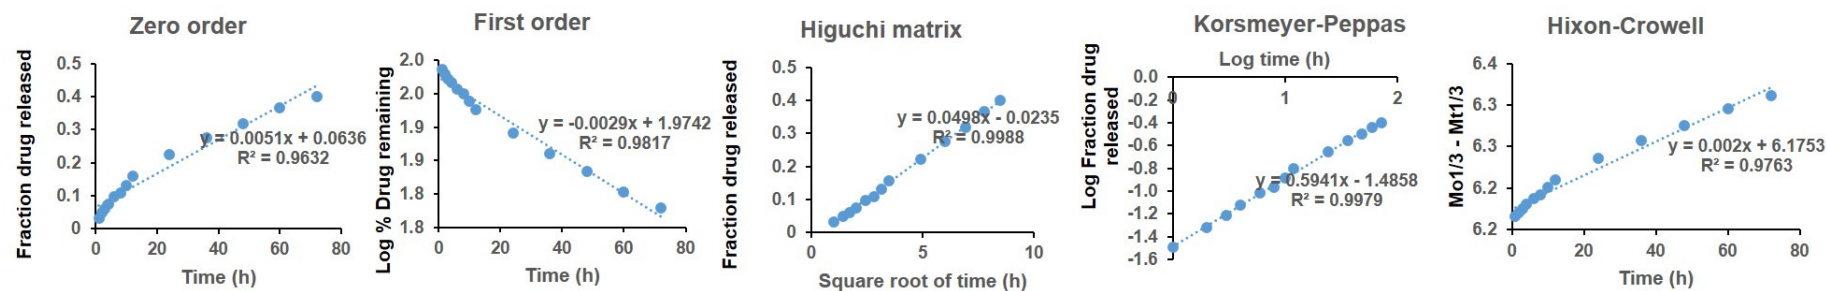

(B) 3%, w/v PVP as stabilizer and  $\text{CHCl}_3$  as organic solvent

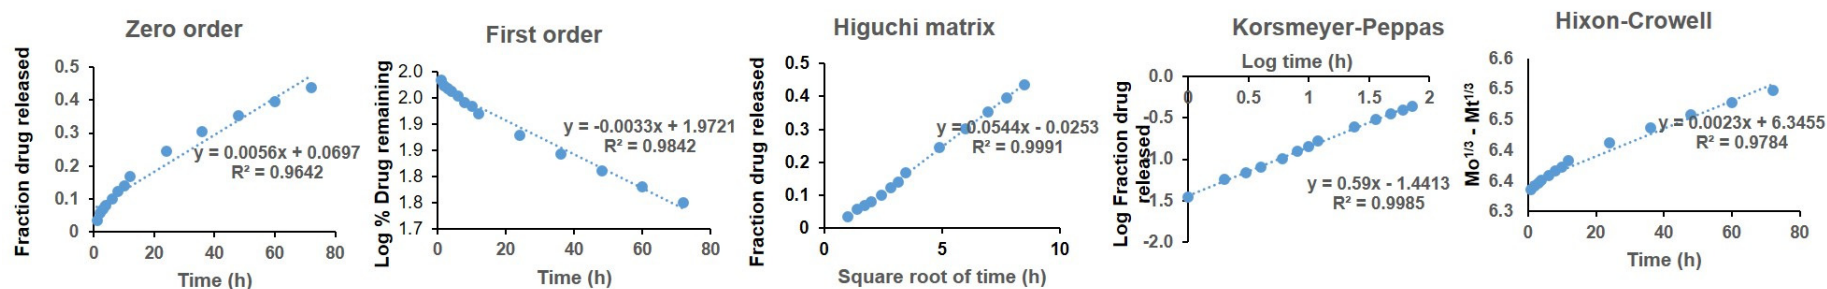

Figure S4

(A) 1%, w/v PVP as stabilizer and DCM as organic solvent

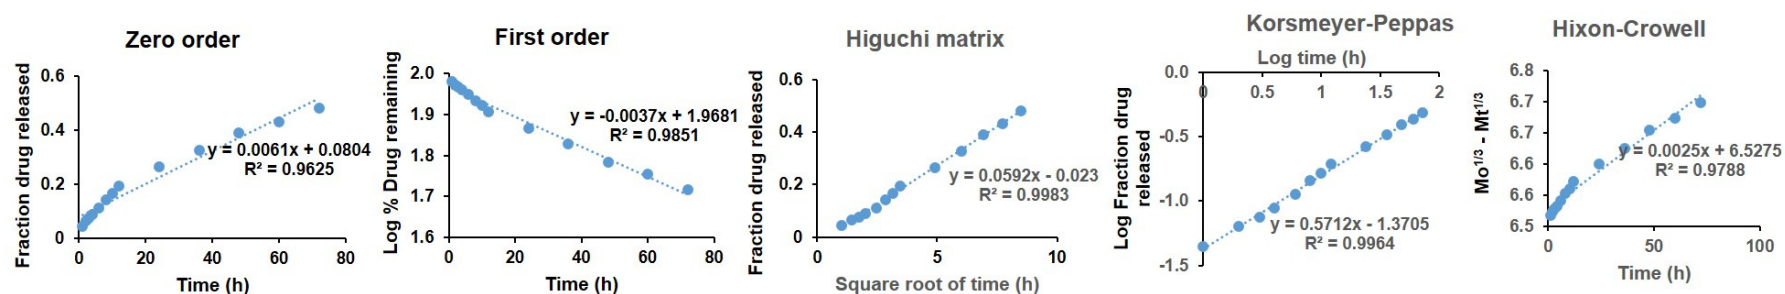

(B) 3%, w/v PVP as stabilizer and DCM as organic solvent

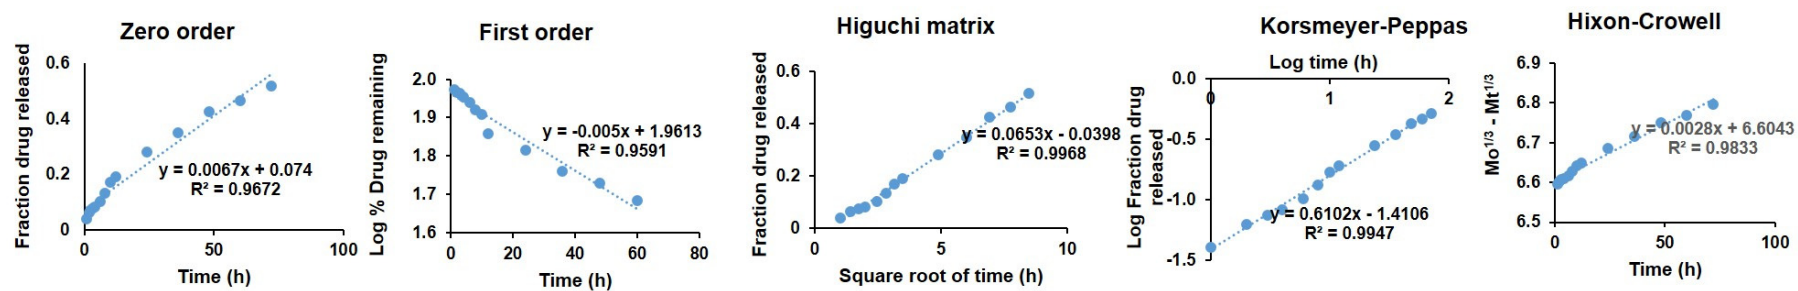

Supplement: s1 [file s1]
